# Supplementary material for: Dysplastic LV5 and Lumbosacral Stability
Source: Research Square preprint supplement (doi:10.21203/rs.3.rs-5576970/v1), 2025-09-17
Supplement: Supplementary file 1 [file c7f185d5d1a399ce00d6126c.xlsx]

## Sheet: STUDY GROUP
CASE NO	AGE	GENDER	HEIGHT	WEIGHT		PRESENTATION		SPINO-PELVIC MEASUREMENTS					MRI DIISC FINDINGS
	Years		metres		BMI		WEDGE ANGLE	LL	LSA	SS	PT	PI	PFIRRMANN GRADE (I-V)		INSTABILITY
													L4/5	L5S1
1	49	F	1.66	83.5	30.3019	LBP	10	30		27	19	46	2	4
2	36	F	1.76	145	46.8104	WEAKNESS RLL	4	36		45	7	52	4	4
3	74	F	1.64	92	34.2058	LBP	9	48		55	13	68	4	5
4	47	M	1.86	115	33.2408	LT SCIATICA	11	25		40	22	62	4	3
5	33	F	1.72	129.8	43.8751	LBP	14	18		40	10	50	4	3
6	58	M	1.93	143	38.3903	LT SCIATICA	2	27		30	22	52	4	4
7	44	F	1.66	55.2	20.0319	LBP/LT SCIATICA	15	28		44	31	75	3	4	LUMBOSASCRAL INSTABILITY
8	50	F	1.61	79.2	30.5544	LBP	2	28		38	30	68	4	4	DOMED SACRUM
9	52	M	1.69	85.5	29.9359	RT SCIATICA	15	29		28	35	62	2	4	FRACTURE PARS LV5 (SPONDYLOLYSIS L5/S1)
10	50	F	1.74	92	30.3871	WEAKNESS BOTH LEGS	4	32		33	30	63	3	5	FRACTURE PARS LV5 (SPONDYLOLYSIS L5/S1)
11	56	F	1.63	107.2	40.3478	LBP	10	40		49	5	54	4	3	FRACTURE PARS LV4 (SPONDYLOLYSIS L4/5)
12	37	F	1.67	82.8	29.6891	RT SCIATICA	8	40	28	42	13	55	2	4	L5/S1 DISC PROLPSE
13	55	M	1.58	64.8	25.9574	LBP	9	35		41	17	58	2	4
14	34	F	1.7	106.7	36.9204	LBP/RT SCIATICA	10	30	11	26	36	62	2	4
15	58	F	1.68	65	23.03	LBP	8	67	15	28	30	58	3	4
16	29	F	1.64	62.9	23.3864	LT SCIATICA	10	10	8	20	28	48	2	4	L5/S1DISC PROLAPSE
17	68	M	1.72	94.1	31.8077	LBP	10	30	12	32	18	54	3	4
18	41	F	1.59	77.2	30.5368	LBP	5	22	17	35	35	70	2	2
19	40	F	1.635	120.8	45.1889	LBP	12	24	15	22	39	61	4	2	FRACTURE PARS LV4 (SPONDYLOLYSIS L4/5)
20	77	F	1.62	77.6	29.5687	LBP/RT SCIATICA	4	45	13	35	17	52	3	5
21	50	M	1.715	68.5	23.2896	LBP	2	25	10	29	11	40	2	2	ASD, APEX L3/4
22	65	M	1.76	131	42.2908	LBP/LT SCIATICA	8	26	8	30	28	58	2	4
23	44	F	1.595	75	29.4808	RT SCIATICA	5	28	7	45	25	70	4	2
24	38	F	1.7	57.3	19.827	LBP	0	38	20	48	4	52	1	1
25	47	M	1.81	96.7	29.5168	LBP	8	18	16	31	11	42	2	5	FRACTURE PARS LV5 (SPONDYLOLYSIS L5/S1)
26	50	F	1.67	108.9	39.0477	LBP/LT SCIATICA	0	7	20	27	24	51	4	4	ASD, APEX L3/4
27	38	F	1.61	54.7	21.1026	LBP/RT SCIATICA	7	68	10	51	24	75	2	4	FRACTURE PARS LV5 (SPONDYLOLYSIS L5/S1)
28	35	M	1.75	86.9	28.3755	LBP	18	62	10	40	12	52	2	4	DYSPLASTIC SV1
29	68	F	1.64	76.1	28.2942	LBP/LT SCIATICA	18	40	12	40	35	75	4	4	FACET JOINT DISEASE
30	55	F	1.66	108.6	39.4107	LBP/RT SCIATICA	4	40	12	40	7	47	3	3	FACET JOINT DISEASE
31	73	F	1.55	62.8	26.1394	SPINAL STENOSIS	22	68	16	55	25	80	3	5
32	50	F	1.58	89.5	35.8516	LBP/RT SCIATICA	13	18	6	12	38	50	3	3	FACET JOINT DISEASE
33	42	M	1.682	76.2	26.9341	LBP	4	4	9	30	20	50	4	4	FRACTURE PARS LV4 (SPONDYLOLYSIS L4/5)
34	64	F	1.65	83	30.4867	LBP/LT SCIATICA	6	58	12	50	7	57	4	4	OBLIQUE TAKE-OFF
35	43	F	1.58	85	34.049	LBP	16	44	17	41	25	66	4	3	FRACTURE PARS LV4 (SPONDYLOLYSIS L4/5)
36	44	F	1.57	81	32.8614	LBP	8	30	11	40	21	61	3	4
37	56	F	1.72	84.3	28.4951	LBP	5	36	25	52	25	67	2	2	FRACTURE PARS LV4 (SPONDYLOLYSIS L4/5)
38	44	F	1.63	82.3	30.9759	LBP	11	46	19	42	24	66	4	4
39	40	F	1.63	67	25.2174	LBP	-5	58	-6	55	0	55	4	5	FRACTURE PARS LV4 (SPONDYLOLYSIS L4/5)
40	41	M	1.71	87.1	29.7869	LBP	7	32	12	41	17	58	3	5
41	49	F	1.61	72	27.7767	LBP	14	45	8	38	25	63	2	4
42	48	M	1.61	68.1	26.2721	LBP	13	42	12	39	15	54	2	2
43	34	F	1.62	66.3	25.2629	LBP	14	17	20	44	12	56	2	2	ATHLETE
44	31	M	1.68	87	30.8248	LBP	10	45	20	48	10	58	2	2
45	41	M	1.77	89.8	28.6635	LBP	13	53	20	45	14	59	4	4	FRACTURE PARS LV4 (SPONDYLOLYSIS L4/5)
46	30	F	1.57	60.1	24.3823	LBP	10	29	0	18	37	55	1	3	FRACTURE PARS LV5 (SPONDYLOLYSIS L5/S1)
47	68	F	1.49	66	29.7284	LBP	8	48	14	50	22	72	5	4	SPONDYLOLISTHESIS L4/5
48	37	M	1.71	83.4	28.5216	LBP	17	42	5	42	12	54	2	4	FRACTURE PARS LV5 (SPONDYLOLYSIS L5/S1)
49	54	M	1.88	93.3	26.3977	LBP	11	30	16	23	15	38	2	5	FRACTURE PARS LV5 (SPONDYLOLYSIS L5/S1)
50	51	F	1.53	78.7	33.6195	LBP	11	40	24	45	17	62	4	5
51	26	F	1.71	52.4	17.92	lbp	15	16	10	33	20	53	2	4
52
53	53	M	1.8	99	30.5556	LBP	0	25		40	10	50	0	4
54	40	F	1.56	91	37.3932	LBP	0	20		21	30	51	0	3
55	61	F	1.62	87	33.1504	LBP	2	26	15	36	20	56	17	3	ANTEROLISTHESIS L5S1
56	38	M	1.63	77.6	29.207	LBP	9	2	2	4	47	51	0	4	SPONDYLOLYSIS L4/5
57	42	F	1.635	77.2	28.879	CLBP	2	38	8	10	45	55	0	2
58	60	M	1.69	90.7	31.7566	LBP	0	7	14	19	19	38	0	2	SPONDYLOLYSIS L5/S1
59	54	F	1.68	80	28.3447	LBP	0	22	22	48	17	65	0	4
60	42	M	1.682	76.2	26.9341	LBP	4	4	9	30	20	50	0	4	SPONDYLOLYSIS L4/5
61	35	F	1.54	44	18.5529	LBP	15	28	18	27	31	58	0	2
62	21	F	1.62	50.8	19.3568	LBP	2	52	-3	27	27	54	0	1
63	49	F	1.71	88.9	30.4025	LBP/RT SCIATICA	1	31	22	43	7	50	0	1
64	40	M	1.8	98	30.2469	LBP	0	28	25	32	8	40	0	1
65	45	F	1.62	66.3	25.2629	LBP	0	23	14	36	16	52	0	1
66	45	M	1.74	81.7	26.9851	LBP	0	3	20	22	13	35	0	1	DYSPLASTIC SVI
67	68	M	1.76	72.3	23.3407	LBP	3	13	13	25	43	68	0	4	SEVERLY DEGENERATIVE SPINE
68	46	M	1.86	117.1	33.8478	LBP	3	17	20	36	10	46	0	2
69	51	F	1.74	97	32.0386	LBP	0	34	17	38	14	52	0	2	HEREDITARY MULTIPLE EXOSTOSIS
70	47	F	1.68	86	30.4705	LBP	2	18	12	35	13	48	0	2
71
72
73
74
75
76
77
78
79
80
81
82
83
84
85
86
87
88
89
90
91
92
93
94
95
96
97
98
99
100
101
102
103
104
105
106
107
108
109
110
111
112
113
114
115
116
117
118
119
120
121
122
123
124
125
126
127
128
129
130
131
132
133
134
135
136
137
138
139
140
141
142
143
144
145
146
147
148
149
150
151
152
153
154
155
156
157
158
159
160
161
162
163
164
165
166
167
168
169
170
171
172
173
174
175
176
177
178
179
180
181
182
183
184
185
186
187
188
189
190
191
192
193
194
195
196
197
198
199
200
201
202
203
204
205
206
207
208
209
210
211
212
213
214
215
216
217
	32.5867	0	1.13503	58.1107	20.7329	0		23.96		25.7867	13.8533	39.5467	1.98667	2.49333

## Sheet: CONTROL CASES
	NAME	AGE	GENDER	metres		BMI	PRESENTATION	WEDGE ANGLE	LL	LSA	SS	PT	PI	%	PFIRRMANN GRADE (I-V)		OTHER
	EFFECTS OF DYSPLASTIC LV5 ON THE STABILITY LUMBOSACRAL JUNCTION IN ADULTHOOD
	NAME	AGE	GENDER	HEIGHT	WEIGHT		PRESENTATION		SPINO-PELVIC MEASUREMENTS					LISTHEISIS	MRI DIISC FINDINGS
		Years		metres		BMI		WEDGE ANGLE	LL	LSA	SS	PT	PI	%	PFIRRMANN GRADE (I-V)		OTHER
															L4/5	L5S1
1	KOMBO NAFT	53	M	1.8	99	30.5556	LBP	0	25		40	10	50	0	4	2
2	RUTH NDUNGU	40	F	1.56	91	37.3932	LBP	0	20		21	30	51	0	3	3
3	MARY MWAISAKA	61	F	1.62	87	33.1504	LBP	2	26	15	36	20	56	17	3	5	ANTEROLISTHESIS L5S1
4	CALEB SANG	38	M	1.63	77.6	29.207	LBP	9	2	2	4	47	51	0	4	2	SPONDYLOLYSIS L4/5
5	VIVIAN ACHIENG	42	F	1.635	77.2	28.879	CLBP	2	38	8	10	45	55	0	2	2
6	CHANDAN BARMERJEE	60	M	1.69	90.7	31.7566	LBP	0	7	14	19	19	38	0	2	4	SPONDYLOLYSIS L5/S1
7	ETHEL MWASIGHADI	54	F	1.68	80	28.3447	LBP	0	22	22	48	17	65	0	4	4
8	JAMES KINYANJUI	42	M	1.682	76.2	26.9341	LBP	4	4	9	30	20	50	0	4	4	SPONDYLOLYSIS L4/5
9	ESTHER NETO	35	F	1.54	44	18.5529	LBP	15	28	18	27	31	58	0	2	5
10	AMINA ALI	21	F	1.62	50.8	19.3568	LBP	2	52	-3	27	27	54	0	1	1
11	PENINAH MITAU	49	F	1.71	88.9	30.4025	LBP/RT SCIATICA	1	31	22	43	7	50	0	1	1
12	GASPER OYUGI	40	M	1.8	98	30.2469	LBP	0	28	25	32	8	40	0	1	1
13	ANNE KALUME	45	F	1.62	66.3	25.2629	LBP	0	23	14	36	16	52	0	1	2
14	SAMSON WANYONYI	45	M	1.74	81.7	26.9851	LBP	0	3	20	22	13	35	0	1	4	DYSPLASTIC SVI
15	ASHOK PATEL	68	M	1.76	72.3	23.3407	LBP	3	13	13	25	43	68	0	4	4	SEVERLY DEGENERATIVE SPINE
16	JEFTER KISEMBA	46	M	1.86	117.1	33.8478	LBP	3	17	20	36	10	46	0	2	2
17	ANNAH MWENDE	51	F	1.74	97	32.0386	LBP	0	34	17	38	14	52	0	2	4	HEREDITARY MULTIPLE EXOSTOSIS
18	CAROLINE WANJIRO	47	F	1.68	86	30.4705	LBP	2	18	12	35	13	48	0	2	4
19	Severin Aswani	32	F			#DIV/0!		8	25	7	52	24	76	0	1	1
20						#DIV/0!
21						#DIV/0!
22						#DIV/0!
23						#DIV/0!
24						#DIV/0!
25						#DIV/0!
26						#DIV/0!
27						#DIV/0!
28						#DIV/0!
29						#DIV/0!
30						#DIV/0!
31						#DIV/0!
32						#DIV/0!
33						#DIV/0!
34						#DIV/0!
35						#DIV/0!
36						#DIV/0!
37						#DIV/0!
38						#DIV/0!
39						#DIV/0!
40						#DIV/0!
41						#DIV/0!
42						#DIV/0!
43						#DIV/0!
44						#DIV/0!
45						#DIV/0!
46						#DIV/0!
47						#DIV/0!
48						#DIV/0!
49						#DIV/0!
50						#DIV/0!
51						#DIV/0!
52						#DIV/0!
53						#DIV/0!
54						#DIV/0!
55						#DIV/0!
56						#DIV/0!
57						#DIV/0!
58						#DIV/0!
59						#DIV/0!
60						#DIV/0!
61						#DIV/0!
62						#DIV/0!
63						#DIV/0!
64						#DIV/0!
65						#DIV/0!
66						#DIV/0!
67						#DIV/0!
68						#DIV/0!
69						#DIV/0!
70						#DIV/0!
71						#DIV/0!
72						#DIV/0!
73						#DIV/0!
74						#DIV/0!
75						#DIV/0!
76						#DIV/0!
77						#DIV/0!
78						#DIV/0!
79						#DIV/0!
80						#DIV/0!
81						#DIV/0!
82						#DIV/0!
83						#DIV/0!
84						#DIV/0!
85						#DIV/0!
86						#DIV/0!
87						#DIV/0!
88						#DIV/0!
89						#DIV/0!
90						#DIV/0!
91						#DIV/0!
92						#DIV/0!
93						#DIV/0!
94						#DIV/0!
95						#DIV/0!
96						#DIV/0!
97						#DIV/0!
98						#DIV/0!
99						#DIV/0!
100						#DIV/0!
101						#DIV/0!
102						#DIV/0!
103						#DIV/0!
104						#DIV/0!
105						#DIV/0!
106						#DIV/0!
107						#DIV/0!
108						#DIV/0!
109						#DIV/0!
110						#DIV/0!
111						#DIV/0!
112						#DIV/0!
113						#DIV/0!
114						#DIV/0!
115						#DIV/0!
116						#DIV/0!
117						#DIV/0!
118						#DIV/0!
119						#DIV/0!
120						#DIV/0!
121						#DIV/0!
122						#DIV/0!
123						#DIV/0!
124						#DIV/0!
125						#DIV/0!
126						#DIV/0!
127						#DIV/0!
128						#DIV/0!
129						#DIV/0!
130						#DIV/0!
131						#DIV/0!
132						#DIV/0!
133						#DIV/0!
134						#DIV/0!
135						#DIV/0!
136						#DIV/0!
137						#DIV/0!
138						#DIV/0!
139						#DIV/0!
140						#DIV/0!
141						#DIV/0!

## Sheet: ANALYSIS
	NAME		AGE	GENDER	metres		BMI	PRESENTATION	Height Posterior Elements		DIFFERENCE	DEFFICIENCY	Height BODY LV5 (A/P)		WEDGE ANGLE	LL	LSA	SS	PT	PI	PFIRRMANN GRADE (I-V)		INSTABILITY	%
	EFFECTS OF DYSPLASTIC LV5 ON THE STABILITY LUMBOSACRAL JUNCTION IN ADULTHOOD
	NAME		AGE	GENDER	HEIGHT	WEIGHT		PRESENTATION	VERTEBRAL MEASUREMENT							SPINO-PELVIC MEASUREMENTS					MRI DIISC FINDINGS
			Years		metres		BMI		Height Posterior Elements		DIFFERENCE		Height BODY LV5		WEDGE ANGLE	LL	LSA	SS	PT	PI	PFIRRMANN GRADE (I-V)		INSTABILITY	%
CASE	NAME	GROUP	AGE	GENDER	HEIGHT	WEIGHT	BMI	PRESENTATION	LV4	LV5		DEFFICIENCY	ANTERIOR	POSTERIOR							L4/5	L5S1
1	LILIAN OTWANE	1	49	2	1.66	83.5	30.3019	LBP	23	15	8	34.7826	26	21	10	30		27	19	46	2	4	6	0
2	JANET ORONY	1	36	2	1.76	145	46.8104	WEAKNESS RLL	16	9	7	43.75	12	10	4	36		45	7	52	4	4	6	0
3	TERESIA ONDIEKI	1	74	2	1.64	92	34.2058	LBP	20	12	8	40	28	22	9	48		55	13	68	4	5	6	0
4	THUREA SLIM	1	33	2	1.72	129.8	43.8751	LBP	25	12	13	52	29	22	14	18		40	10	50	4	3	6	0
5	ESTHER SIDI	1	44	2	1.66	55.2	20.0319	LBP/LT SCIATICA	22	11	11	50	25	18	15	28		44	31	75	3	4	2	0
6	ZAHARA OMAR	1	50	2	1.61	79.2	30.5544	LBP	16	9	7	43.75	20	18	2	28		38	30	68	4	4	4	0
7	NORAH KIENDE	1	50	2	1.74	92	30.3871	WEAKNESS BOTH LEGS	20	8	12	60	22	20	4	32		33	30	63	3	5	2	30
8	TERESIA WILLIAM	1	56	2	1.63	107.2	40.3478	LBP	20	13	7	35	23	18	10	40		49	5	54	4	3	2	25
9	MELLAP AWIMBO	1	37	2	1.67	82.8	29.6891	RT SCIATICA	16	13	-3	-23.0769	18	15	8	40	28	42	13	55	2	4	3	0
10	LEAH WANJIRU	1	34	2	1.7	106.7	36.9204	LBP/RT SCIATICA	26	16	10	38.4615	28	21	10	30	11	26	36	62	2	4	6	0
11	K PASTA	1	58	2	1.68	65	23.03	LBP	22	8	14	63.6364	26	23	8	67	15	28	30	58	3	4	6	0		KEY
12	JACKLINE CHEROP	1	29	2	1.64	62.9	23.3864	LT SCIATICA	20	12	8	40	22	17	10	10	8	20	28	48	2	4	3	16		SPONDYLOLISTHESIS	1
13	CHRISTINE AMONDI	1	41	2	1.59	77.2	30.5368	LBP	17	9	8	47.0588	18	16	5	22	17	35	35	70	2	2	6	0		SPONDYLOLYS (FRACTURE PARS)	2
14	DORIS MUTEMBEI	1	40	2	1.635	120.8	45.1889	LBP	21	12	9	42.8571	23	18	12	24	15	22	39	61	4	2	2	20		DISC PROLPSE (L5/S1 OR L4L5)	3
15	JANET KAITI	1	77	2	1.62	77.6	29.5687	LBP/RT SCIATICA	20	13	7	35	22	20	4	45	13	35	17	52	3	5	6	0		DOMED SACRUM OR DYSPLASTIC	4
16	ESTHER NJAMBI	1	44	2	1.595	75	29.4808	RT SCIATICA	29	13	16	55.1724	27	23	5	28	7	45	25	70	4	2	6	0		FACET JOINT DISEASE	5
17	JANE WAHINYA	1	38	2	1.7	57.3	19.827	LBP	22	11	11	50	22	22	0	38	20	48	4	52	1	1	6	0		NONE	6
18	RUKIA MZERA	1	50	2	1.67	108.9	39.0477	LBP/LT SCIATICA	25	10	15	60	22	22	0	7	20	27	24	51	4	4	6	15
19	SIMALOI DAJON	1	38	2	1.61	54.7	21.1026	LBP/RT SCIATICA	27	14	13	48.1481	24	20	7	68	10	51	24	75	2	4	2	0
20	FRANCISCA MUOKI	1	68	2	1.64	76.1	28.2942	LBP/LT SCIATICA	16	7	9	56.25	20	15	18	40	12	40	35	75	4	4	5	0
21	HELEN MANYARA	1	55	2	1.66	108.6	39.4107	LBP/RT SCIATICA	14	8	6	42.8571	24	22	4	40	12	40	7	47	3	3	5	0
22	HABIBA ALI	1	73	2	1.55	62.8	26.1394	SPINAL STENOSIS	15	5	10	66.6667	22	14	22	68	16	55	25	80	3	5	6	15
23	MERCY NJENGA	1	50	2	1.58	89.5	35.8516	LBP/RT SCIATICA	20	15	5	25	18	12	13	18	6	12	38	50	3	3	5	0
24	ASLI HUSSEIN	1	64	2	1.65	83	30.4867	LBP/LT SCIATICA	21	11	10	47.619	24	21	6	58	12	50	7	57	4	4	6	0
25	PRISCIRA MWADIME	1	43	2	1.58	85	34.049	LBP	18	10	8	44.4444	21	16	16	44	17	41	25	66	4	3	2	0
26	LYDIAH KADZO	1	44	2	1.57	81	32.8614	LBP	23	9	14	60.8696	22	18	8	30	11	40	21	61	3	4	6	0
27	MILKAH ONGERI	1	56	2	1.72	84.3	28.4951	LBP	22	14	8	36.3636	22	20	5	36	25	52	25	67	2	2	2	0
28	TABITHA SHALLY	1	44	2	1.63	82.3	30.9759	LBP	20	9	11	55	22	17	11	46	19	42	24	66	4	4	6	0
29	CAROLINE LILO	1	40	2	1.63	67	25.2174	LBP	25	10	15	60	20	17	-5	58	-6	55	0	55	4	5	2	0
30	ALICE KAZUNGU	1	49	2	1.61	72	27.7767	LBP	20	12	8	40	27	20	14	45	8	38	25	63	2	4	6	0
31	CHEPKORIL MITEI	1	34	2	1.62	66.3	25.2629	LBP	18	9	9	50	22	16	14	17	20	44	12	56	2	2	6	0
32	EMMY CHELANGAT	1	30	2	1.57	60.1	24.3823	LBP	12	7	5	41.6667	21	17	10	29	0	18	37	55	1	3	2	0
33	FATMA MOHAMMED	1	68	2	1.49	66	29.7284	LBP	11	6	5	45.4545	20	16	8	48	14	50	22	72	5	4	1	32
34	MEBAKALI ALI	1	51	2	1.53	78.7	33.6195	LBP	20	15	5	25	25	20	11	40	24	45	17	62	4	5	6
35	Tabitha Ashley Jahalo	1	26	2	1.71	52.4	17.92	lbp	21	12	9	42.8571	21	16	15	16	10	33	20	53	2	4	6
36	CLEOPHAS	1	47	1	1.86	115	33.2408	LT SCIATICA	22	14	8	36.3636	26	19	11	25		40	22	62	4	3	6	0
37	FRED OWINO	1	58	1	1.93	143	38.3903	LT SCIATICA	24	11	13	54.1667	23	21	2	27		30	22	52	4	4	6	0
38	JAIRUS MUSEMBI	1	52	1	1.69	85.5	29.9359	RT SCIATICA	20	10	10	50	25	18	15	29		28	35	62	2	4	2	0
39	VINCENT KILONZO	1	55	1	1.58	64.8	25.9574	LBP	19	8	11	57.8947	20	17	9	35		41	17	58	2	4	6	0
40	ANTHONY KHAEMBA	1	68	1	1.72	94.1	31.8077	LBP	21	14	7	33.3333	25	20	10	30	12	32	18	54	3	4	6	0
41	GEORGE CHOGO	1	50	1	1.715	68.5	23.2896	LBP	25	13	12	48	24	23	2	25	10	29	11	40	2	2	6	0
42	LIUKAS OKOTH	1	65	1	1.76	131	42.2908	LBP/LT SCIATICA	16	8	8	50	25	20	8	26	8	30	28	58	2	4	6	0
43	HARON NYABERI	1	47	1	1.81	96.7	29.5168	LBP	20	10	10	50	24	20	8	18	16	31	11	42	2	5	2	0
44	DANIEL KIMANTHI	1	35	1	1.75	86.9	28.3755	LBP	24	25	1	4	26	20	18	62	10	40	12	52	2	4	4	0
45	JAMES KINYANJUI	1	42	1	1.682	76.2	26.9341	LBP	20	17	3	15	22	20	4	4	9	30	20	50	4	4	2	0
46	JAMES GICHEHA	1	41	1	1.71	87.1	29.7869	LBP	20	10	10	50	21	17	7	32	12	41	17	58	3	5	6	0
47	JOSHUA MUTUA	1	48	1	1.61	68.1	26.2721	LBP	23	18	5	21.7391	23	18	13	42	12	39	15	54	2	2	6	0
48	JAFFARY KAMANZA	1	31	1	1.68	87	30.8248	LBP	25	9	16	64	19	16	10	45	20	48	10	58	2	2	6	0
49	FRANCIS MUTERO	1	41	1	1.77	89.8	28.6635	LBP	25	10	15	60	27	20	13	53	20	45	14	59	4	4	2	0
50	MAHESHA PRATHAP	1	37	1	1.71	83.4	28.5216	LBP	22	9	13	59.0909	25	15	17	42	5	42	12	54	2	4	2	0
51	DAVID KAGERA	1	54	1	1.88	93.3	26.3977	LBP	22	8	14	63.6364	21	17	11	30	16	23	15	38	2	5	2	0
52	RUTH NDUNGU	2	40	2	1.56	91	37.3932	LBP	22	26	4	15.3846	20	20	0	20		21	30	51	3	3	6
53	MARY MWAISAKA	2	61	2	1.62	87	33.1504	LBP	21	20	-1	-21	23	22	2	26	15	36	20	56	3	5	1
54	VIVIAN ACHIENG	2	42	2	1.635	77.2	28.879	CLBP	23	23	0	0	24	23	2	38	8	10	45	55	2	2	6
55	ETHEL MWASIGHADI	2	54	2	1.68	80	28.3447	LBP	21	21	0	0	24	24	0	22	22	48	17	65	4	4	6
56	ESTHER NETO	2	35	2	1.54	44	18.5529	LBP	22	17	-5	-29.4118	22	17	15	28	18	27	31	58	2	5	6
57	AMINA ALI	2	21	2	1.62	50.8	19.3568	LBP	25	12	13	52	25	25	2	52	-3	27	27	54	1	1	6
58	PENINAH MITAU	2	49	2	1.71	88.9	30.4025	LBP/RT SCIATICA	20	15	-5	-33.3333	24	22	1	31	22	43	7	50	1	1	6
59	ANNE KALUME	2	45	2	1.62	66.3	25.2629	LBP	20	18	-2	-11.1111	25	25	0	23	14	36	16	52	1	2	6
60	ANNAH MWENDE	2	51	2	1.74	97	32.0386	LBP	20	20	0	0	22	22	0	34	17	38	14	52	2	4	6
61	CAROLINE WANJIRO	2	47	2	1.68	86	30.4705	LBP	25	26	-1	-4	20	19	2	18	12	35	13	48	2	4	6
62	KOMBO NAFT	2	53	1	1.8	99	30.5556	LBP	20	28	8	28.5714	23	23	0	25		40	10	50	4	2	6
63	CALEB SANG	2	38	1	1.63	77.6	29.207	LBP	17	17	0	0	17	15	9	2	2	4	47	51	4	2	2
64	CHANDAN BARMERJEE	2	60	1	1.69	90.7	31.7566	LBP	20	22	2	9.09091	24	24	0	7	14	19	19	38	2	4	2
65	JAMES KINYANJUI	2	42	1	1.682	76.2	26.9341	LBP	20	17	3	15	22	20	4	4	9	30	20	50	4	4	2
66	GASPER OYUGI	2	40	1	1.8	98	30.2469	LBP	25	25	0	0	23	23	0	28	25	32	8	40	1	1	6
67	SAMSON WANYONYI	2	45	1	1.74	81.7	26.9851	LBP	21	22	1	4.54545	21	21	0	3	20	22	13	35	1	4	4
68	ASHOK PATEL	2	68	1	1.76	72.3	23.3407	LBP	22	22	0	0	25	23	3	13	13	25	43	68	4	4	6
69	JEFTER KISEMBA	2	46	1	1.86	117.1	33.8478	LBP	21	26	5	19.2308	24	22	3	17	20	36	10	46	2	2	6

## Sheet: ANALYSIS 2
CASE	GROUP	AGE	GENDER	HEIGHT	WEIGHT	BMI	PRESENTATION	ANTERIOR	POSTERIOR	WEDGE ANGLE	LL	LSA	SS	PT	PI	PFIRRMANN GRADE (I-V)		DEFORMITY
								Height BODY LV5
CASE	GROUP	AGE	GENDER	HEIGHT	WEIGHT	BMI	PRESENTATION	ANTERIOR	POSTERIOR	WEDGE ANGLE	LL	LSA	SS	PT	PI	PFIRRMANN GRADE (I-V)		INSTABILITY
1	1	50	1	1.715	68.5	23.2896	1	24	23	2	25	10	29	11	40	2	2	6		KEY
2	1	48	1	1.61	68.1	26.2721	1	23	18	13	42	12	39	15	54	2	2	6		LBP	1
3	1	31	1	1.68	87	30.8248	1	19	16	10	45	20	48	10	58	2	2	6		LBP & Sciatica	2
4	1	47	1	1.86	115	33.2408	2	26	19	11	25		40	22	62	4	3	6		Isolated Sciatica	3
5	1	37	1	1.71	83.4	28.5216	1	25	15	17	42	5	42	12	54	2	4	2		Claudication/weakness	4
6	1	52	1	1.69	85.5	29.9359	2	25	18	15	29		28	35	62	2	4	2		NONE	5
7	1	35	1	1.75	86.9	28.3755	1	26	20	18	62	10	40	12	52	2	4	4
8	1	55	1	1.58	64.8	25.9574	1	20	17	9	35		41	17	58	2	4	6
9	1	65	1	1.76	131	42.2908	2	25	20	8	26	8	30	28	58	2	4	6
10	1	68	1	1.72	94.1	31.8077	1	25	20	10	30	12	32	18	54	3	4	6		DEFOMITY
11	1	42	1	1.682	76.2	26.9341	1	22	20	4	4	9	30	20	50	4	4	2		KEY
12	1	41	1	1.77	89.8	28.6635	1	27	20	13	53	20	45	14	59	4	4	2		SPONDYLOLISTHESIS	1
13	1	58	1	1.93	143	38.3903	2	23	21	2	27		30	22	52	4	4	6		SPONDYLOLYS (FRACTURE PARS)	2
14	1	47	1	1.81	96.7	29.5168	1	24	20	8	18	16	31	11	42	2	5	2		DISC PROLPSE (L5/S1 OR L4L5)	3
15	1	54	1	1.88	93.3	26.3977	1	21	17	11	30	16	23	15	38	2	5	2		DOMED SACRUM OR DYSPLASTIC	4
16	1	41	1	1.71	87.1	29.7869	1	21	17	7	32	12	41	17	58	3	5	6		FACET JOINT DISEASE	5
17	1	38	2	1.7	57.3	19.827	1	22	22	0	38	20	48	4	52	1	1	6		NONE	6
18	1	56	2	1.72	84.3	28.4951	1	22	20	5	36	25	52	25	67	2	2	2
19	1	41	2	1.59	77.2	30.5368	1	18	16	5	22	17	35	35	70	2	2	6
20	1	34	2	1.62	66.3	25.2629	1	22	16	14	17	20	44	12	56	2	2	6
21	1	40	2	1.635	120.8	45.1889	1	23	18	12	24	15	22	39	61	4	2	2
22	1	44	2	1.595	75	29.4808	2	27	23	5	28	7	45	25	70	4	2	6
23	1	30	2	1.57	60.1	24.3823	1	21	17	10	29		18	37	55	1	3	2
24	1	55	2	1.66	108.6	39.4107	2	24	22	4	40	12	40	7	47	3	3	5
25	1	50	2	1.58	89.5	35.8516	2	18	12	13	18	6	12	38	50	3	3	5
26	1	56	2	1.63	107.2	40.3478	1	23	18	10	40		49	5	54	4	3	2
27	1	43	2	1.58	85	34.049	1	21	16	16	44	17	41	25	66	4	3	2
28	1	33	2	1.72	129.8	43.8751	1	29	22	14	18		40	10	50	4	3	6
29	1	38	2	1.61	54.7	21.1026	2	24	20	7	68	10	51	24	75	2	4	2
30	1	37	2	1.67	82.8	29.6891	2	18	15	8	40	28	42	13	55	2	4	3
31	1	29	2	1.64	62.9	23.3864	3	22	17	10	10	8	20	28	48	2	4	3
32	1	49	2	1.66	83.5	30.3019	1	26	21	10	30		27	19	46	2	4	6
33	1	49	2	1.61	72	27.7767	1	27	20	14	45	8	38	25	63	2	4	6
34	1	26	2	1.71	52.4	17.92	1	21	16	15	16	10	33	20	53	2	4	6
35	1	34	2	1.7	106.7	36.9204	3	28	21	10	30	11	26	36	62	2	4	6
36	1	44	2	1.66	55.2	20.0319	2	25	18	15	28		44	31	75	3	4	2
37	1	58	2	1.68	65	23.03	1	26	23	8	67	15	28	30	58	3	4	6
38	1	44	2	1.57	81	32.8614	1	22	18	8	30	11	40	21	61	3	4	6
39	1	50	2	1.61	79.2	30.5544	1	20	18	2	28		38	30	68	4	4	4
40	1	68	2	1.64	76.1	28.2942	2	20	15	18	40	12	40	35	75	4	4	5
41	1	44	2	1.63	82.3	30.9759	1	22	17	11	46	19	42	24	66	4	4	6
42	1	50	2	1.67	108.9	39.0477	2	22	22	0	7	20	27	24	51	4	4	6
43	1	64	2	1.65	83	30.4867	2	24	21	6	58	12	50	7	57	4	4	6
44	1	36	2	1.76	145	46.8104	4	12	10	4	36		45	7	52	4	4	6
45	1	68	2	1.49	66	29.7284	1	20	16	8	48	14	50	22	72	5	4	1
46	1	50	2	1.74	92	30.3871	4	22	20	4	32		33	30	63	3	5	2
47	1	77	2	1.62	77.6	29.5687	2	22	20	4	45	13	35	17	52	3	5	6
48	1	73	2	1.55	62.8	26.1394	2	22	14	22	68	16	55	25	80	3	5	6
49	1	40	2	1.63	67	25.2174	1	20	17	-5	58	-6	55	0	55	4	5	2
50	1	74	2	1.64	92	34.2058	1	28	22	9	48		55	13	68	4	5	6
51	1	51	2	1.53	78.7	33.6195	1	25	20	11	40	24	45	17	62	4	5	6
52	2	40	1	1.8	98	30.2469	1	23	23	0	28	25	32	8	40	1	1	6
53	2	40	1	1.8	98	30.2469	1	23	23	0	28	25	32	8	40	1	1	6
54	2	40	1	1.8	98	30.2469	1	23	23	0	28	25	32	8	40	1	1	6
55	2	46	1	1.86	117.1	33.8478	1	24	22	3	17	20	36	10	46	2	2	6
56	2	46	1	1.86	117.1	33.8478	1	24	22	3	17	20	36	10	46	2	2	6
57	2	46	1	1.86	117.1	33.8478	1	24	22	3	17	20	36	10	46	2	2	6
58	2	38	1	1.63	77.6	29.207	1	17	15	9	2	2	4	47	51	4	2	2
59	2	38	1	1.63	77.6	29.207	1	17	15	9	2	2	4	47	51	4	2	2
60	2	38	1	1.63	77.6	29.207	1	17	15	9	2	2	4	47	51	4	2	2
61	2	53	1	1.8	99	30.5556	1	23	23	0	25		40	10	50	4	2	6
62	2	53	1	1.8	99	30.5556	1	23	23	0	25		40	10	50	4	2	6
63	2	53	1	1.8	99	30.5556	1	23	23	0	25		40	10	50	4	2	6
64	2	45	1	1.74	81.7	26.9851	1	21	21	0	3	20	22	13	35	1	4	4
65	2	45	1	1.74	81.7	26.9851	1	21	21	0	3	20	22	13	35	1	4	4
66	2	45	1	1.74	81.7	26.9851	1	21	21	0	3	20	22	13	35	1	4	4
67	2	60	1	1.69	90.7	31.7566	1	24	24	0	7	14	19	19	38	2	4	2
68	2	60	1	1.69	90.7	31.7566	1	24	24	0	7	14	19	19	38	2	4	2
69	2	60	1	1.69	90.7	31.7566	1	24	24	0	7	14	19	19	38	2	4	2
70	2	42	1	1.682	76.2	26.9341	1	22	20	4	4	9	30	20	50	4	4	2
71	2	42	1	1.682	76.2	26.9341	1	22	20	4	4	9	30	20	50	4	4	2
72	2	42	1	1.682	76.2	26.9341	1	22	20	4	4	9	30	20	50	4	4	2
73	2	68	1	1.76	72.3	23.3407	1	25	23	3	13	13	25	43	68	4	4	6
74	2	68	1	1.76	72.3	23.3407	1	25	23	3	13	13	25	43	68	4	4	6
75	2	68	1	1.76	72.3	23.3407	1	25	23	3	13	13	25	43	68	4	4	6
76	2	21	2	1.62	50.8	19.3568	1	25	25	2	52	-3	27	27	54	1	1	6
77	2	21	2	1.62	50.8	19.3568	1	25	25	2	52	-3	27	27	54	1	1	6
78	2	21	2	1.62	50.8	19.3568	1	25	25	2	52	-3	27	27	54	1	1	6
79	2	49	2	1.71	88.9	30.4025	2	24	22	1	31	22	43	7	50	1	1	6
80	2	49	2	1.71	88.9	30.4025	2	24	22	1	31	22	43	7	50	1	1	6
81	2	49	2	1.71	88.9	30.4025	2	24	22	1	31	22	43	7	50	1	1	6
82	2	45	2	1.62	66.3	25.2629	1	25	25	0	23	14	36	16	52	1	2	6
83	2	45	2	1.62	66.3	25.2629	1	25	25	0	23	14	36	16	52	1	2	6
84	2	45	2	1.62	66.3	25.2629	1	25	25	0	23	14	36	16	52	1	2	6
85	2	42	2	1.635	77.2	28.879	1	24	23	2	38	8	10	45	55	2	2	6
86	2	42	2	1.635	77.2	28.879	1	24	23	2	38	8	10	45	55	2	2	6
87	2	42	2	1.635	77.2	28.879	1	24	23	2	38	8	10	45	55	2	2	6
88	2	40	2	1.56	91	37.3932	1	20	20	0	20		21	30	51	3	3	6
89	2	40	2	1.56	91	37.3932	1	20	20	0	20		21	30	51	3	3	6
90	2	40	2	1.56	91	37.3932	1	20	20	0	20		21	30	51	3	3	6
91	2	51	2	1.74	97	32.0386	1	22	22	0	34	17	38	14	52	2	4	6
92	2	47	2	1.68	86	30.4705	1	20	19	2	18	12	35	13	48	2	4	6
93	2	51	2	1.74	97	32.0386	1	22	22	0	34	17	38	14	52	2	4	6
94	2	47	2	1.68	86	30.4705	1	20	19	2	18	12	35	13	48	2	4	6
95	2	51	2	1.74	97	32.0386	1	22	22	0	34	17	38	14	52	2	4	6
96	2	47	2	1.68	86	30.4705	1	20	19	2	18	12	35	13	48	2	4	6
97	2	54	2	1.68	80	28.3447	1	24	24	0	22	22	48	17	65	4	4	6
98	2	54	2	1.68	80	28.3447	1	24	24	0	22	22	48	17	65	4	4	6
99	2	54	2	1.68	80	28.3447	1	24	24	0	22	22	48	17	65	4	4	6
100	2	35	2	1.54	44	18.5529	1	22	17	15	28	18	27	31	58	2	5	6
101	2	35	2	1.54	44	18.5529	1	22	17	15	28	18	27	31	58	2	5	6
102	2	35	2	1.54	44	18.5529	1	22	17	15	28	18	27	31	58	2	5	6
103	2	61	2	1.62	87	33.1504	1	23	22	2	26	15	36	20	56	3	5	1
104	2	61	2	1.62	87	33.1504	1	23	22	2	26	15	36	20	56	3	5	1
105	2	61	2	1.62	87	33.1504	1	23	22	2	26	15	36	20	56	3	5	1

## Sheet: ANALYSIS 3
CASE	GROUP	AGE	GENDER	HEIGHT	WEIGHT	BMI	PRESENTATION	ANTERIOR	POSTERIOR	WEDGE ANGLE	LL	LSA	SS	PT	PI	PFIRRMANN GRADE (I-V)		INSTABILITY
1	1	49	2	1.66	83.5	30.3019	1	26	21	10	30		27	19	46	2	4	6		KEY
2	1	74	2	1.64	92	34.2058	1	28	22	9	48		55	13	68	4	5	6		LBP	1
3	1	33	2	1.72	129.8	43.8751	1	29	22	14	18		40	10	50	4	3	6		LBP & Sciatica	2
4	1	50	2	1.61	79.2	30.5544	1	20	18	2	28		38	30	68	4	4	4		Isolated Sciatica	3
5	1	56	2	1.63	107.2	40.3478	1	23	18	10	40		49	5	54	4	3	2		Claudication/weakness	4
6	1	58	2	1.68	65	23.03	1	26	23	8	67	15	28	30	58	3	4	6		NONE	5
7	1	41	2	1.59	77.2	30.5368	1	18	16	5	22	17	35	35	70	2	2	6
8	1	40	2	1.635	120.8	45.1889	1	23	18	12	24	15	22	39	61	4	2	2
9	1	38	2	1.7	57.3	19.827	1	22	22	0	38	20	48	4	52	1	1	6
10	1	43	2	1.58	85	34.049	1	21	16	16	44	17	41	25	66	4	3	2
11	1	44	2	1.57	81	32.8614	1	22	18	8	30	11	40	21	61	3	4	6		KEY
12	1	56	2	1.72	84.3	28.4951	1	22	20	5	36	25	52	25	67	2	2	2		SPONDYLOLISTHESIS	1
13	1	44	2	1.63	82.3	30.9759	1	22	17	11	46	19	42	24	66	4	4	6		SPONDYLOLYS (FRACTURE PARS)	2
14	1	40	2	1.63	67	25.2174	1	20	17	-5	58	-6	55	0	55	4	5	2		DISC PROLPSE (L5/S1 OR L4L5)	3
15	1	49	2	1.61	72	27.7767	1	27	20	14	45	8	38	25	63	2	4	6		DOMED SACRUM OR DYSPLASTIC	4
16	1	34	2	1.62	66.3	25.2629	1	22	16	14	17	20	44	12	56	2	2	6		FACET JOINT DISEASE	5
17	1	30	2	1.57	60.1	24.3823	1	21	17	10	29		18	37	55	1	3	2		NONE	6
18	1	68	2	1.49	66	29.7284	1	20	16	8	48	14	50	22	72	5	4	1
19	1	51	2	1.53	78.7	33.6195	1	25	20	11	40	24	45	17	62	4	5	6
20	1	26	2	1.71	52.4	17.92	1	21	16	15	16	10	33	20	53	2	4	6			Group 1	Group 2	Pvalue
21	1	55	1	1.58	64.8	25.9574	1	20	17	9	35		41	17	58	2	4	6		Wedge angle
22	1	68	1	1.72	94.1	31.8077	1	25	20	10	30	12	32	18	54	3	4	6		Lumbar Lordosis
23	1	50	1	1.715	68.5	23.2896	1	24	23	2	25	10	29	11	40	2	2	6		Lumbosacral angle
24	1	47	1	1.81	96.7	29.5168	1	24	20	8	18	16	31	11	42	2	5	2		Sacral slope
25	1	35	1	1.75	86.9	28.3755	1	26	20	18	62	10	40	12	52	2	4	4		Pelvic tilt
26	1	42	1	1.682	76.2	26.9341	1	22	20	4	4	9	30	20	50	4	4	2		Pelvic index
27	1	41	1	1.71	87.1	29.7869	1	21	17	7	32	12	41	17	58	3	5	6
28	1	48	1	1.61	68.1	26.2721	1	23	18	13	42	12	39	15	54	2	2	6
29	1	31	1	1.68	87	30.8248	1	19	16	10	45	20	48	10	58	2	2	6
30	1	41	1	1.77	89.8	28.6635	1	27	20	13	53	20	45	14	59	4	4	2
31	1	37	1	1.71	83.4	28.5216	1	25	15	17	42	5	42	12	54	2	4	2
32	1	54	1	1.88	93.3	26.3977	1	21	17	11	30	16	23	15	38	2	5	2
33	2	40	2	1.56	91	37.3932	1	20	20	0	20		21	30	51	3	3	6
34	2	61	2	1.62	87	33.1504	1	23	22	2	26	15	36	20	56	3	5	1
35	2	42	2	1.635	77.2	28.879	1	24	23	2	38	8	10	45	55	2	2	6
36	2	54	2	1.68	80	28.3447	1	24	24	0	22	22	48	17	65	4	4	6
37	2	35	2	1.54	44	18.5529	1	22	17	15	28	18	27	31	58	2	5	6
38	2	21	2	1.62	50.8	19.3568	1	25	25	2	52	-3	27	27	54	1	1	6
39	2	45	2	1.62	66.3	25.2629	1	25	25	0	23	14	36	16	52	1	2	6
40	2	51	2	1.74	97	32.0386	1	22	22	0	34	17	38	14	52	2	4	6
41	2	47	2	1.68	86	30.4705	1	20	19	2	18	12	35	13	48	2	4	6
42	2	53	1	1.8	99	30.5556	1	23	23	0	25		40	10	50	4	2	6
43	2	38	1	1.63	77.6	29.207	1	17	15	9	2	2	4	47	51	4	2	2
44	2	60	1	1.69	90.7	31.7566	1	24	24	0	7	14	19	19	38	2	4	2
45	2	42	1	1.682	76.2	26.9341	1	22	20	4	4	9	30	20	50	4	4	2
46	2	40	1	1.8	98	30.2469	1	23	23	0	28	25	32	8	40	1	1	6
47	2	45	1	1.74	81.7	26.9851	1	21	21	0	3	20	22	13	35	1	4	4
48	2	68	1	1.76	72.3	23.3407	1	25	23	3	13	13	25	43	68	4	4	6
49	2	46	1	1.86	117.1	33.8478	1	24	22	3	17	20	36	10	46	2	2	6
50	1	44	2	1.66	55.2	20.0319	2	25	18	15	28		44	31	75	3	4	2
51	1	37	2	1.67	82.8	29.6891	2	18	15	8	40	28	42	13	55	2	4	3
52	1	77	2	1.62	77.6	29.5687	2	22	20	4	45	13	35	17	52	3	5	6
53	1	44	2	1.595	75	29.4808	2	27	23	5	28	7	45	25	70	4	2	6
54	1	50	2	1.67	108.9	39.0477	2	22	22	0	7	20	27	24	51	4	4	6
55	1	38	2	1.61	54.7	21.1026	2	24	20	7	68	10	51	24	75	2	4	2
56	1	68	2	1.64	76.1	28.2942	2	20	15	18	40	12	40	35	75	4	4	5
57	1	55	2	1.66	108.6	39.4107	2	24	22	4	40	12	40	7	47	3	3	5
58	1	73	2	1.55	62.8	26.1394	2	22	14	22	68	16	55	25	80	3	5	6
59	1	50	2	1.58	89.5	35.8516	2	18	12	13	18	6	12	38	50	3	3	5
60	1	64	2	1.65	83	30.4867	2	24	21	6	58	12	50	7	57	4	4	6
61	1	47	1	1.86	115	33.2408	2	26	19	11	25		40	22	62	4	3	6
62	1	58	1	1.93	143	38.3903	2	23	21	2	27		30	22	52	4	4	6
63	1	52	1	1.69	85.5	29.9359	2	25	18	15	29		28	35	62	2	4	2
64	1	65	1	1.76	131	42.2908	2	25	20	8	26	8	30	28	58	2	4	6
65	2	49	2	1.71	88.9	30.4025	2	24	22	1	31	22	43	7	50	1	1	6
66	1	34	2	1.7	106.7	36.9204	3	28	21	10	30	11	26	36	62	2	4	6
67	1	29	2	1.64	62.9	23.3864	3	22	17	10	10	8	20	28	48	2	4	3
68	1	36	2	1.76	145	46.8104	4	12	10	4	36		45	7	52	4	4	6
69	1	50	2	1.74	92	30.3871	4	22	20	4	32		33	30	63	3	5	2
1	1	68	2	1.49	66	29.7284	1	20	16	8	48	14	50	22	72	5	4	1
2	2	61	2	1.62	87	33.1504	1	23	22	2	26	15	36	20	56	3	5	1
3	1	44	2	1.66	55.2	20.0319	2	25	18	15	28		44	31	75	3	4	2
4	1	50	2	1.74	92	30.3871	4	22	20	4	32		33	30	63	3	5	2
5	1	56	2	1.63	107.2	40.3478	1	23	18	10	40		49	5	54	4	3	2
6	1	40	2	1.635	120.8	45.1889	1	23	18	12	24	15	22	39	61	4	2	2
7	1	38	2	1.61	54.7	21.1026	2	24	20	7	68	10	51	24	75	2	4	2
8	1	43	2	1.58	85	34.049	1	21	16	16	44	17	41	25	66	4	3	2
9	1	56	2	1.72	84.3	28.4951	1	22	20	5	36	25	52	25	67	2	2	2
10	1	40	2	1.63	67	25.2174	1	20	17	-5	58	-6	55	0	55	4	5	2
11	1	30	2	1.57	60.1	24.3823	1	21	17	10	29		18	37	55	1	3	2
12	1	52	1	1.69	85.5	29.9359	2	25	18	15	29		28	35	62	2	4	2
13	1	47	1	1.81	96.7	29.5168	1	24	20	8	18	16	31	11	42	2	5	2
14	1	42	1	1.682	76.2	26.9341	1	22	20	4	4	9	30	20	50	4	4	2
15	1	41	1	1.77	89.8	28.6635	1	27	20	13	53	20	45	14	59	4	4	2
16	1	37	1	1.71	83.4	28.5216	1	25	15	17	42	5	42	12	54	2	4	2
17	1	54	1	1.88	93.3	26.3977	1	21	17	11	30	16	23	15	38	2	5	2
18	2	38	1	1.63	77.6	29.207	1	17	15	9	2	2	4	47	51	4	2	2
19	2	60	1	1.69	90.7	31.7566	1	24	24	0	7	14	19	19	38	2	4	2
20	2	42	1	1.682	76.2	26.9341	1	22	20	4	4	9	30	20	50	4	4	2
21	1	37	2	1.67	82.8	29.6891	2	18	15	8	40	28	42	13	55	2	4	3
22	1	29	2	1.64	62.9	23.3864	3	22	17	10	10	8	20	28	48	2	4	3
23	1	50	2	1.61	79.2	30.5544	1	20	18	2	28		38	30	68	4	4	4
24	1	35	1	1.75	86.9	28.3755	1	26	20	18	62	10	40	12	52	2	4	4
25	2	45	1	1.74	81.7	26.9851	1	21	21	0	3	20	22	13	35	1	4	4
26	1	68	2	1.64	76.1	28.2942	2	20	15	18	40	12	40	35	75	4	4	5
27	1	55	2	1.66	108.6	39.4107	2	24	22	4	40	12	40	7	47	3	3	5
28	1	50	2	1.58	89.5	35.8516	2	18	12	13	18	6	12	38	50	3	3	5
29	1	49	2	1.66	83.5	30.3019	1	26	21	10	30		27	19	46	2	4	6
30	1	36	2	1.76	145	46.8104	4	12	10	4	36		45	7	52	4	4	6
31	1	74	2	1.64	92	34.2058	1	28	22	9	48		55	13	68	4	5	6
32	1	33	2	1.72	129.8	43.8751	1	29	22	14	18		40	10	50	4	3	6
33	1	34	2	1.7	106.7	36.9204	3	28	21	10	30	11	26	36	62	2	4	6
34	1	58	2	1.68	65	23.03	1	26	23	8	67	15	28	30	58	3	4	6
35	1	41	2	1.59	77.2	30.5368	1	18	16	5	22	17	35	35	70	2	2	6
36	1	77	2	1.62	77.6	29.5687	2	22	20	4	45	13	35	17	52	3	5	6
37	1	44	2	1.595	75	29.4808	2	27	23	5	28	7	45	25	70	4	2	6
38	1	38	2	1.7	57.3	19.827	1	22	22	0	38	20	48	4	52	1	1	6
39	1	50	2	1.67	108.9	39.0477	2	22	22	0	7	20	27	24	51	4	4	6
40	1	73	2	1.55	62.8	26.1394	2	22	14	22	68	16	55	25	80	3	5	6
41	1	64	2	1.65	83	30.4867	2	24	21	6	58	12	50	7	57	4	4	6
42	1	44	2	1.57	81	32.8614	1	22	18	8	30	11	40	21	61	3	4	6
43	1	44	2	1.63	82.3	30.9759	1	22	17	11	46	19	42	24	66	4	4	6
44	1	49	2	1.61	72	27.7767	1	27	20	14	45	8	38	25	63	2	4	6
45	1	34	2	1.62	66.3	25.2629	1	22	16	14	17	20	44	12	56	2	2	6
46	1	51	2	1.53	78.7	33.6195	1	25	20	11	40	24	45	17	62	4	5	6
47	1	26	2	1.71	52.4	17.92	1	21	16	15	16	10	33	20	53	2	4	6
48	1	47	1	1.86	115	33.2408	2	26	19	11	25		40	22	62	4	3	6
49	1	58	1	1.93	143	38.3903	2	23	21	2	27		30	22	52	4	4	6
50	1	55	1	1.58	64.8	25.9574	1	20	17	9	35		41	17	58	2	4	6
51	1	68	1	1.72	94.1	31.8077	1	25	20	10	30	12	32	18	54	3	4	6
52	1	50	1	1.715	68.5	23.2896	1	24	23	2	25	10	29	11	40	2	2	6
53	1	65	1	1.76	131	42.2908	2	25	20	8	26	8	30	28	58	2	4	6
54	1	41	1	1.71	87.1	29.7869	1	21	17	7	32	12	41	17	58	3	5	6
55	1	48	1	1.61	68.1	26.2721	1	23	18	13	42	12	39	15	54	2	2	6
56	1	31	1	1.68	87	30.8248	1	19	16	10	45	20	48	10	58	2	2	6
57	2	40	2	1.56	91	37.3932	1	20	20	0	20		21	30	51	3	3	6
58	2	42	2	1.635	77.2	28.879	1	24	23	2	38	8	10	45	55	2	2	6
59	2	54	2	1.68	80	28.3447	1	24	24	0	22	22	48	17	65	4	4	6
60	2	35	2	1.54	44	18.5529	1	22	17	15	28	18	27	31	58	2	5	6
61	2	21	2	1.62	50.8	19.3568	1	25	25	2	52	-3	27	27	54	1	1	6
62	2	49	2	1.71	88.9	30.4025	2	24	22	1	31	22	43	7	50	1	1	6
63	2	45	2	1.62	66.3	25.2629	1	25	25	0	23	14	36	16	52	1	2	6
64	2	51	2	1.74	97	32.0386	1	22	22	0	34	17	38	14	52	2	4	6
65	2	47	2	1.68	86	30.4705	1	20	19	2	18	12	35	13	48	2	4	6
66	2	53	1	1.8	99	30.5556	1	23	23	0	25		40	10	50	4	2	6
67	2	40	1	1.8	98	30.2469	1	23	23	0	28	25	32	8	40	1	1	6
68	2	68	1	1.76	72.3	23.3407	1	25	23	3	13	13	25	43	68	4	4	6
69	2	46	1	1.86	117.1	33.8478	1	24	22	3	17	20	36	10	46	2	2	6

## Sheet: RESULTS
1	Groups:		N
	1	NORMAL LV5 & SV1	54
	2	DYSPLASTIC LV5/S1	51
2	Aggregated data
		Group 1	Group 2	T test Pvalue
	Age	46.5	47.9216	0.6662
	Height	1.68706	1.66916	0.000544686
	Weight	82.2667	85.4569	0.5789
	BMI	28.707	30.4896	0.2694
	GENDER
		Group 1	Group 2	F test
	Male	24	19	0.629948
	Female	30	32
	TOTAL	54	51
3	Measurements
a	Idependent Paired t-test
		Group 1 Mean	STD Deviation	Group 2 Mean	STD Deviation	Sig. (2-tailed)	Levene's Test for Equality of Variances
	Wedge angle	2.38889	3.86749	9.11765	5.30527	0.001	3.844	0.054		9.11765	5.30527
	Lumbar Lordosis	21.7222	13.0916	35.2353	15.0354	0.001	0.632	0.43
	Lumbosacral angle	14.4	7.74412	13.3939	7.17609	0.673	0.008	0.928
	Sacral slope	29.3889	11.304	37.9216	10.1012	0.009	0.175	0.677
	Pelvic tilt	21.6667	12.7787	20.3725	9.79788	0.699	1.921	0.17
	Pelvic index	51.0556	8.29225	58.1569	9.23336	0.005	1.008	0.319
b	Point-biserial correlation
		GROUP MEANS
	Parameters	Group1	Group2	Pearson CM	Sig. (2-tailed)
	Pelvic Index	51.0556	58.1569	-0.376	7.83088e-05
	Lordosis	21.7222	35.2353	0.506	3.74492e-08
	Lumbosacral angle	14.4	13.3939	-0.59	4.30432e-11
	Pelvic Tilt	21.6667	20.3725	0.0525289	0.630988
	Sacral Slope	29.3889	37.9216	-0.439	2.77834e-06		Sacral Slope	37.9216	29.3889	-0.439	2.77834e-06
	**. Correlation is significant at the 0.01 level (2-tailed).
	A point-biserial correlation was run to determine the relationship between engagement in an Internet advert and gender.
	There was a negative correlation between engagement and gender, which was statistically significant (rpb = -.358, n = 40, p = .023).						0
4	CLINICAL IMPLICATION
a	Presentation
	Presentation	Group1	Group2	Total	Chi sq
	LBP	49	29	78	0.00103714
	Sciatica	3	17	20	0.00692922
	Claudication/weakness	1	3	4	0.67957
	Other	1	2	3	0.941634
	Total	54	51	105
b	DEFORMITY (MRI)
						17	0	0	INSTABILITY
	Spondylolysis (Pars fracture)	16	7	23	0.00101247	38	12.1421	10.8579			Frequency	Percent	Valid Percent	Cumulative Percent
	Domed or dysplastic S1	7	0	7	0.00323739	33	3.69543	3.30457	Valid	SPONDYLOLISTHESIS	17	16.1905	16.1905	16.1905
	FacetT Joint Disease (L4/5, L5/s1)	3	11	14	0.048064	1	7.39086	6.60914		SPONDYLOLYSIS	38	36.1905	36.1905	52.381
	DISC DISEASE (Pfirrman >3) (L4/5, L5/s1)	55	42	97	0.398271	16	51.2081	45.7919		DISC PROLAPSE	16	15.2381	15.2381	67.619
	None	23	33	56	0.32562		31.4378	39.9154		DYSPLASTIC OR/AND DOMED SACRUM	33	31.4286	31.4286	99.0476
	Total	104	93	197						FACET JOINT DISEASE	1	0.952381	0.952381	100
										Total	105	100	100
c	Disc Disease in the dysplastic Group (N = 51)
	Pfirrman Grading	L4/5	L5/S1	Total	Chi sq
	1	5	1	6	0.0228748
	2	15	8	23	0.0016457
	3	19	11	30	0.00446765
	4	11	20	31	0.0120202
	5	1	11	12	0.0396024
	Total	51	51	102
	Model Summaryb
	Model	R	R Square	Adjusted R Square
					Sig. F Change
	1	.666a	0.442969	0.437561	9.52833e-15
	ANOVAa
	Model	Sum of Squares	df	Mean Square	F	Sig.
	Regression	452.773	1	452.773	81.909	.000b
	Residual	569.36	103	5.528
	Total	1022.13	104
	a. Predictors: (Constant), WEDGE ANGLE
	b. Dependent Variable: Lumbar Lordosis
								Std. Error of the Estimate	Change Statistics
									R Square Change	F Change	df1	df2
								2.35112	0.442969	81.9089	1	103
